# Supplementary material for: New Insights on Drought Stress Response by Global Investigation of Gene Expression Changes in Sheepgrass (Leymus chinensis)
Source: Front Plant Sci. 2016 Jun 30;7:954. doi: 10.3389/fpls.2016.00954 (PMC4928129; doi:10.3389/fpls.2016.00954)
Supplement: Table S4 — A list of differentially expressed genes between rewatering and drought stress. [file Table4.XLSX]

## Sheet: Rewater_Drought_
Gene	"log2(Fold_change)normalized"	result
contig83397	-8.6122	down
4-GJVU7SP04ITTBI	-8.14372	down
contig81287	-7.09763	down
contig11406	-7.02067	down
contig17255	-6.85321	down
contig81433	-6.80812	down
contig30448	-6.73171	down
4-GJVU7SP04IP0RT	-6.4747	down
contig26216	-6.4747	down
contig01868	-6.4158	down
contig42354	-6.22316	down
contig49482	-6.21166	down
1-GH8N3EB01BM0OW	-6.18839	down
0-FUZKD2G01CBSZ1	-6.11624	down
2-GH8N3EB02J2JU9	-6.11624	down
contig04905	-6.11624	down
contig19448	-6.11281	down
4-GJVU7SP04JKISS	-6.08823	down
contig06244	-6.05966	down
3-GH8N3EB01C0FGE	-6.04029	down
contig86923	-5.96012	down
contig11481	-5.94632	down
contig66170	-5.87524	down
contig58487	-5.76158	down
contig89011	-5.76158	down
contig94691	-5.76158	down
contig42277	-5.75565	down
contig83341	-5.7497	down
contig34057	-5.68882	down
contig01384	-5.66373	down
contig56715	-5.6382	down
contig74606	-5.6382	down
contig06022	-5.6122	down
contig09664	-5.58573	down
contig09665	-5.58573	down
contig62465	-5.53128	down
contig61155	-5.53128	down
contig78876	-5.53128	down
contig24877	-5.44299	down
contig82791	-5.4158	down
contig00828	-5.4158	down
contig35199	-5.39308	down
3-GH8N3EB01D5Q77	-5.38543	down
1-GH8N3EB01COLD4	-5.37	down
contig00780	-5.37	down
contig51881	-5.35839	down
2-GH8N3EB02HLEE6	-5.3544	down
4-GJVU7SP04JNAVZ	-5.3544	down
contig44567	-5.3544	down
2-GH8N3EB02IDLME	-5.32269	down
contig30700	-5.29027	down
contig35146	-5.29027	down
contig45989	-5.29027	down
contig76530	-5.29027	down
contig84174	-5.29027	down
contig33502	-5.25711	down
contig15962	-5.22843	down
contig89299	-5.22659	down
contig56445	-5.22316	down
2-GH8N3EB02J64GK	-5.22316	down
contig65098	-5.22316	down
contig17063	-5.20272	down
4-GJVU7SP04I0AN5	-5.18839	down
contig45804	-5.17889	down
contig85609	-5.17662	down
contig93955	-5.17662	down
1-GH8N3EB01E9I8E	-5.15277	down
contig62426	-5.15277	down
contig63275	-5.15277	down
contig67130	-5.15277	down
contig86208	-5.11624	down
contig28712	-5.10697	down
contig22788	-5.08418	down
2-GH8N3EB02F8UDG	-5.07877	down
contig51603	-5.07877	down
contig94574	-5.07877	down
contig95352	-5.07877	down
2-GH8N3EB02HIK84	-5.05966	down
contig89728	-5.05966	down
contig26373	-5.04029	down
contig79358	-5.04029	down
0-FOWZWMP02MO08C	-5.00077	down
1-GH8N3EB01EAQ3C	-5.00077	down
contig01108	-5.00077	down
contig16254	-5.00077	down
contig62543	-5.00077	down
contig79379	-5.00077	down
contig82400	-5.00077	down
contig94583	-5.00077	down
contig16750	-4.98819	down
contig68055	-4.9738	down
contig42473	-4.94632	down
contig10016	-4.92887	down
contig90245	-4.9277	down
0-FS6QTAF04IPNHJ	-4.92133	down
contig22458	-4.9183	down
0-FUZKD2G01CCOB7	-4.9183	down
2-GH8N3EB02IU3KL	-4.9183	down
contig18361	-4.9183	down
contig31059	-4.9183	down
contig69954	-4.9183	down
contig72238	-4.9183	down
contig88503	-4.81573	down
contig06143	-4.80353	down
contig78875	-4.80047	down
contig90278	-4.78504	down
contig85393	-4.78504	down
contig94110	-4.78504	down
contig14610	-4.78339	down
contig19815	-4.77336	down
contig10763	-4.7663	down
contig46029	-4.7505	down
contig59644	-4.7497	down
contig02055	-4.74879	down
contig89729	-4.73773	down
contig82114	-4.72161	down
0-FOWZWMP02M7VT6	-4.68882	down
1-GH8N3EB01DK2VB	-4.68882	down
4-GJVU7SP04JPK2R	-4.68882	down
contig76429	-4.68882	down
contig49544	-4.67633	down
contig58384	-4.66373	down
0-FS6QTAF04I7UPH	-4.6382	down
contig07205	-4.6382	down
contig19298	-4.62526	down
contig29152	-4.60613	down
contig07984	-4.58573	down
contig49373	-4.58573	down
contig83344	-4.58573	down
contig63053	-4.58573	down
contig02257	-4.53128	down
2-GH8N3EB02F4DVO	-4.53128	down
contig14613	-4.53128	down
contig26654	-4.53128	down
contig31694	-4.53128	down
contig66253	-4.53128	down
contig78376	-4.51267	down
contig28276	-4.50289	down
contig57737	-4.4747	down
contig01443	-4.4747	down
contig03505	-4.4747	down
contig11554	-4.4747	down
contig29059	-4.4747	down
contig87486	-4.4747	down
contig09130	-4.45533	down
contig09879	-4.44555	down
contig28372	-4.44555	down
contig19784	-4.43507	down
contig26800	-4.4158	down
contig67131	-4.38543	down
contig84653	-4.36926	down
2-GH8N3EB02F9253	-4.36689	down
contig63568	-4.3544	down
3-GH8N3EB01A0FA5	-4.3544	down
contig31073	-4.3544	down
contig70515	-4.3544	down
contig89726	-4.3418	down
contig24724	-4.32269	down
contig61646	-4.32269	down
contig59408	-4.32269	down
contig75425	-4.32269	down
contig81348	-4.32269	down
contig56013	-4.31811	down
contig55700	-4.29682	down
2-GH8N3EB02GRNS0	-4.29027	down
2-GH8N3EB02JWBB3	-4.29027	down
3-GH8N3EB02GEIL6	-4.29027	down
contig29022	-4.29027	down
contig94831	-4.29027	down
contig38653	-4.2782	down
contig09637	-4.27378	down
contig64797	-4.24023	down
0-FO0JX8101D2KI1	-4.22316	down
1-GH8N3EB01DC16X	-4.22316	down
contig50408	-4.22316	down
contig51876	-4.22316	down
contig76844	-4.22316	down
contig95058	-4.22316	down
contig95131	-4.22316	down
contig91730	-4.21794	down
contig93314	-4.20722	down
contig93949	-4.18134	down
contig85923	-4.17662	down
2-GH8N3EB02G0QHA	-4.16304	down
contig03514	-4.15277	down
contig37673	-4.15277	down
contig89297	-4.15277	down
1-GH8N3EB01DXT6N	-4.15277	down
contig59918	-4.15277	down
contig78399	-4.15277	down
contig89012	-4.15277	down
2-GH8N3EB02JI3S8	-4.15277	down
contig16900	-4.15277	down
contig22416	-4.15277	down
contig23903	-4.15277	down
contig65755	-4.15277	down
contig69725	-4.15277	down
contig78874	-4.15277	down
contig38729	-4.14516	down
3-GH8N3EB02H6YKI	-4.11624	down
contig14773	-4.11339	down
contig17531	-4.10838	down
contig78085	-4.10386	down
2-GH8N3EB02H55M0	-4.09388	down
contig19477	-4.08207	down
contig27576	-4.07877	down
2-GH8N3EB02FT22J	-4.07877	down
contig12376	-4.07877	down
contig24742	-4.07877	down
contig51211	-4.07877	down
contig73706	-4.07877	down
contig87519	-4.07877	down
contig91364	-4.07877	down
contig21509	-4.0632	down
contig42488	-4.05966	down
contig41504	-4.05712	down
contig11817	-4.05323	down
contig51253	-4.04029	down
contig81711	-4.04029	down
contig08082	-4.04029	down
contig57999	-4.03541	down
contig46543	-4.02724	down
0-FTYGYVA04JEUJQ	-4.02349	down
contig35647	-4.02246	down
contig06255	-4.01572	down
contig43640	-4.00964	down
contig06014	-4.00077	down
0-FO0JX8101B6HKU	-4.00077	down
1-GH8N3EB01BM47H	-4.00077	down
1-GH8N3EB01EY9KB	-4.00077	down
2-GH8N3EB02J21PN	-4.00077	down
contig15226	-4.00077	down
contig80303	-4.00077	down
contig82401	-4.00077	down
contig84408	-4.00077	down
contig92964	-4.00077	down
0-FOWZWMP02MRO24	-3.98735	down
contig19521	-3.98333	down
contig93930	-3.97768	down
contig80136	-3.97589	down
1-GH8N3EB01ALZIY	-3.96012	down
contig01984	-3.96012	down
contig70910	-3.96012	down
contig16836	-3.95947	down
3-GH8N3EB02IRHJN	-3.94632	down
2-GH8N3EB02IYD3E	-3.94235	down
contig38566	-3.93638	down
contig38473	-3.92612	down
contig51581	-3.9183	down
contig01795	-3.9183	down
contig56674	-3.9183	down
contig33656	-3.90409	down
contig13579	-3.89986	down
contig83339	-3.89385	down
contig56077	-3.89385	down
3-GH8N3EB01DNLH0	-3.89195	down
contig35216	-3.88973	down
contig64942	-3.88973	down
contig91985	-3.86646	down
contig12554	-3.86646	down
contig42160	-3.86059	down
contig08911	-3.86059	down
contig81334	-3.83084	down
contig52478	-3.83084	down
2-GH8N3EB02G2VZM	-3.83084	down
contig86263	-3.83084	down
contig93902	-3.81041	down
contig07301	-3.80047	down
contig83997	-3.79432	down
contig11446	-3.7902	down
contig46988	-3.78504	down
contig67336	-3.78504	down
contig84486	-3.77955	down
contig93927	-3.77921	down
contig84177	-3.76944	down
contig45497	-3.76944	down
contig33674	-3.73773	down
2-GH8N3EB02I1BUK	-3.73773	down
contig57008	-3.73773	down
contig87601	-3.73773	down
contig13127	-3.7349	down
contig90298	-3.72057	down
1-GH8N3EB01EDUII	-3.71348	down
contig83340	-3.71348	down
contig37660	-3.70531	down
contig93231	-3.70531	down
contig57500	-3.69434	down
2-GH8N3EB02JZDRD	-3.68882	down
contig28963	-3.68882	down
contig13548	-3.68311	down
2-GH8N3EB02JWZUK	-3.67214	down
contig47741	-3.66734	down
contig48915	-3.66373	down
contig14562	-3.65866	down
contig37424	-3.65231	down
contig75935	-3.6382	down
2-GH8N3EB02FMSAU	-3.6382	down
contig88023	-3.6382	down
contig22540	-3.6382	down
contig23212	-3.6382	down
contig85634	-3.63082	down
contig81376	-3.6267	down
contig20724	-3.61511	down
contig93916	-3.60845	down
contig51064	-3.60695	down
contig33682	-3.60343	down
contig57822	-3.60343	down
contig50237	-3.59334	down
contig43354	-3.58573	down
contig60021	-3.58573	down
contig29566	-3.57038	down
contig83343	-3.56781	down
contig93912	-3.56781	down
contig20644	-3.56711	down
2-GH8N3EB02JMPI6	-3.55876	down
contig34858	-3.55331	down
contig23798	-3.54966	down
contig53033	-3.5487	down
contig20016	-3.54848	down
contig13657	-3.54705	down
contig50743	-3.53128	down
contig51766	-3.53128	down
contig90645	-3.50569	down
contig88249	-3.50327	down
contig16688	-3.49922	down
contig59402	-3.49922	down
contig64917	-3.4971	down
contig21297	-3.49516	down
contig13581	-3.49381	down
contig69953	-3.49381	down
contig01097	-3.49381	down
contig57695	-3.49157	down
3-GH8N3EB01C225G	-3.48292	down
contig64405	-3.4747	down
contig40595	-3.46696	down
contig03674	-3.46579	down
contig73801	-3.46311	down
contig60571	-3.4602	down
contig11922	-3.45623	down
contig85426	-3.45533	down
contig04421	-3.45533	down
contig48609	-3.45533	down
0-FTYGYVA04JK9GF	-3.44555	down
2-GH8N3EB02F64JI	-3.44555	down
contig33833	-3.44555	down
contig20875	-3.44228	down
contig67196	-3.43288	down
contig78662	-3.43288	down
contig89731	-3.42721	down
contig38215	-3.42367	down
contig24006	-3.42247	down
contig16618	-3.42102	down
contig11513	-3.4158	down
contig12345	-3.4158	down
0-FO0JX8101CGUMU	-3.4158	down
contig09251	-3.4158	down
contig77912	-3.4158	down
contig12934	-3.40905	down
contig90754	-3.40653	down
contig01208	-3.4007	down
contig38555	-3.39719	down
contig12935	-3.39639	down
contig77680	-3.39563	down
contig10198	-3.39156	down
contig15906	-3.39156	down
contig57978	-3.38543	down
contig84389	-3.38543	down
contig07409	-3.37942	down
contig14885	-3.37681	down
contig15505	-3.37516	down
contig59790	-3.37516	down
contig59825	-3.37516	down
contig93901	-3.36881	down
contig76650	-3.36334	down
contig05004	-3.36222	down
contig01970	-3.3544	down
contig86206	-3.3544	down
contig65048	-3.3544	down
contig76837	-3.3544	down
contig02619	-3.3544	down
contig05365	-3.3544	down
contig08277	-3.3544	down
contig57900	-3.3544	down
contig58300	-3.3544	down
contig60607	-3.3544	down
contig62846	-3.3544	down
contig70254	-3.3544	down
contig30997	-3.35349	down
contig93938	-3.34541	down
contig18346	-3.33864	down
contig35230	-3.33719	down
contig02692	-3.33334	down
contig33093	-3.33334	down
2-GH8N3EB02G48ZU	-3.32409	down
contig61959	-3.32269	down
contig45318	-3.32269	down
contig15586	-3.32151	down
contig45079	-3.32101	down
contig79596	-3.31703	down
contig94053	-3.31197	down
contig50398	-3.30805	down
contig31963	-3.30657	down
contig41697	-3.30477	down
contig18839	-3.30052	down
1-GH8N3EB01ASGSH	-3.29899	down
contig40872	-3.29797	down
contig89466	-3.29027	down
contig34613	-3.29027	down
contig92330	-3.29027	down
contig94025	-3.29027	down
contig06905	-3.29027	down
contig34192	-3.29027	down
contig42308	-3.29027	down
contig74533	-3.29027	down
contig81720	-3.29027	down
0-FO0JX8101CU4SG	-3.29027	down
2-GH8N3EB02IUBX8	-3.29027	down
contig01778	-3.29027	down
contig03052	-3.29027	down
contig22929	-3.29027	down
contig28459	-3.29027	down
contig47088	-3.29027	down
contig58548	-3.29027	down
contig64976	-3.29027	down
contig77831	-3.29027	down
contig90639	-3.29027	down
contig10758	-3.28179	down
1-GH8N3EB01AF27L	-3.28087	down
contig52930	-3.26995	down
2-GH8N3EB02J414M	-3.2638	down
contig41774	-3.25711	down
contig72900	-3.25711	down
contig84778	-3.25711	down
contig20874	-3.25074	down
contig10209	-3.24588	down
contig28550	-3.24588	down
contig46813	-3.24588	down
contig58143	-3.24588	down
contig82492	-3.24588	down
contig03961	-3.2374	down
contig13655	-3.22843	down
contig38639	-3.22791	down
contig10089	-3.22719	down
contig88452	-3.22316	down
contig39642	-3.22316	down
contig66252	-3.22316	down
contig06162	-3.22316	down
contig34249	-3.22316	down
contig56581	-3.22316	down
contig63432	-3.22316	down
contig65069	-3.22316	down
contig70876	-3.22316	down
contig78873	-3.22316	down
contig80692	-3.22316	down
contig26340	-3.21376	down
contig85575	-3.20935	down
contig31481	-3.20935	down
contig86871	-3.20007	down
contig05988	-3.20007	down
contig32987	-3.20007	down
contig01062	-3.19541	down
contig17017	-3.19341	down
contig48349	-3.19341	down
contig20324	-3.19266	down
contig56204	-3.19074	down
contig64008	-3.18839	down
contig93693	-3.18143	down
2-GH8N3EB02JR0D4	-3.18134	down
contig88138	-3.18134	down
contig02473	-3.17323	down
contig05120	-3.16712	down
contig07763	-3.16583	down
contig12224	-3.16583	down
contig55154	-3.16304	down
contig38134	-3.15877	down
contig17141	-3.15853	down
2-GH8N3EB02IDQ87	-3.15277	down
contig43341	-3.15277	down
1-GH8N3EB01DPED7	-3.15277	down
0-FOWZWMP02NKDZJ	-3.15277	down
2-GH8N3EB02I2SDM	-3.15277	down
contig19575	-3.14933	down
contig24763	-3.14372	down
0-FO0JX8101EZKIO	-3.1375	down
contig60229	-3.13462	down
contig27630	-3.13132	down
contig38863	-3.1304	down
contig33586	-3.12852	down
contig08057	-3.128	down
contig42350	-3.1224	down
contig47353	-3.11909	down
contig45899	-3.11707	down
2-GH8N3EB02GQBM4	-3.11487	down
contig14129	-3.10768	down
contig42176	-3.10386	down
contig48400	-3.10386	down
contig83964	-3.10386	down
contig94507	-3.10386	down
contig13101	-3.10222	down
contig41715	-3.10214	down
contig49312	-3.10079	down
contig47325	-3.09933	down
2-GH8N3EB02GDTZ6	-3.09763	down
contig51541	-3.09554	down
contig51000	-3.09388	down
contig39579	-3.09388	down
contig43699	-3.08958	down
contig24036	-3.08207	down
2-GH8N3EB02F9QZP	-3.07877	down
contig94276	-3.07877	down
contig22027	-3.07515	down
contig21245	-3.0635	down
contig41615	-3.0635	down
contig47815	-3.0635	down
contig81272	-3.05966	down
contig27018	-3.05323	down
3-GH8N3EB01DXMID	-3.05323	down
contig43143	-3.05323	down
contig44046	-3.04807	down
contig76568	-3.04585	down
contig13380	-3.04029	down
contig22516	-3.03793	down
contig03892	-3.0378	down
contig37691	-3.03729	down
3-GH8N3EB01EAUVF	-3.03247	down
contig44377	-3.02893	down
contig22612	-3.02432	down
contig18334	-3.02404	down
contig84366	-3.02067	down
contig42361	-3.01914	down
contig64929	-3.01671	down
contig02838	-3.01165	down
0-FO0JX8101B94M7	-3.0082	down
contig24020	-3.00716	down
contig08910	-3.00077	down
contig28447	-3.00077	down
2-GH8N3EB02G6NKH	-3.00077	down
contig09676	-3.00077	down
1-GH8N3EB01C5UL3	-3.00077	down
contig83789	-3.00077	down
2-GH8N3EB02IZ822	-3.00077	down
contig64968	-3.00077	down
0-FO0JX8101AHNBZ	-2.99183	down
contig88829	-2.99131	down
contig16571	-2.98676	down
contig37735	-2.98556	down
contig40739	-2.98465	down
contig59323	-2.98465	down
contig74122	-2.98059	down
contig16124	-2.97489	down
contig40169	-2.97229	down
contig06302	-2.96834	down
contig24067	-2.96834	down
contig46786	-2.96834	down
contig94100	-2.96834	down
contig94332	-2.96834	down
contig03209	-2.96721	down
contig45678	-2.9647	down
contig00568	-2.96012	down
contig26257	-2.96012	down
contig43555	-2.96012	down
contig81889	-2.96012	down
contig83593	-2.96012	down
contig88611	-2.95795	down
contig16908	-2.95737	down
contig05909	-2.95501	down
contig27818	-2.95346	down
contig26636	-2.95247	down
contig59035	-2.95058	down
contig21917	-2.94924	down
contig12154	-2.94632	down
contig32268	-2.94632	down
contig06915	-2.94632	down
contig34415	-2.94632	down
contig35019	-2.94632	down
contig54083	-2.94632	down
0-FOWZWMP02MVPD3	-2.94632	down
1-GH8N3EB01EV5OF	-2.94632	down
contig06490	-2.94632	down
contig35953	-2.94632	down
contig66774	-2.94632	down
contig67393	-2.94632	down
contig39460	-2.94478	down
1-GH8N3EB01AGTG8	-2.94235	down
contig58800	-2.93937	down
contig10178	-2.93937	down
contig43379	-2.93937	down
contig47448	-2.93518	down
contig13018	-2.93518	down
contig80553	-2.93518	down
contig31639	-2.93365	down
contig53369	-2.92887	down
contig92990	-2.9277	down
contig74770	-2.92536	down
contig83452	-2.9183	down
contig45526	-2.9183	down
contig59753	-2.9183	down
0-FOWZWMP02NAEWO	-2.9183	down
contig54983	-2.9183	down
contig77097	-2.9183	down
contig19228	-2.91402	down
contig17024	-2.91121	down
contig56046	-2.91057	down
contig64930	-2.90766	down
contig25163	-2.90613	down
contig46717	-2.90613	down
contig15290	-2.90613	down
contig38355	-2.90451	down
contig46179	-2.90123	down
2-GH8N3EB02I4R0V	-2.89262	down
contig10707	-2.89262	down
contig35620	-2.88973	down
contig59904	-2.88973	down
2-GH8N3EB02JMC8M	-2.88973	down
contig60046	-2.88973	down
1-GH8N3EB01AXTZN	-2.88973	down
contig01152	-2.88973	down
contig01336	-2.88973	down
contig10144	-2.88973	down
contig51093	-2.88973	down
contig69125	-2.88973	down
contig74783	-2.88973	down
contig77674	-2.88973	down
contig65739	-2.88612	down
contig18068	-2.88492	down
contig48154	-2.88395	down
contig92907	-2.88184	down
contig18362	-2.88147	down
contig50631	-2.8792	down
contig59633	-2.87524	down
contig05881	-2.87045	down
2-GH8N3EB02JK9V2	-2.86646	down
contig25640	-2.86646	down
contig56927	-2.86426	down
contig18064	-2.85731	down
contig54769	-2.85638	down
contig39055	-2.85638	down
contig45480	-2.85638	down
contig79948	-2.85638	down
contig23575	-2.85438	down
2-GH8N3EB02FJ1XT	-2.84714	down
contig37840	-2.84576	down
4-GJVU7SP04JRQCQ	-2.8403	down
contig44758	-2.83983	down
contig30258	-2.83727	down
contig15938	-2.83358	down
contig88910	-2.83084	down
contig00778	-2.83084	down
contig88713	-2.83084	down
contig46848	-2.83084	down
contig64623	-2.83084	down
contig27423	-2.83084	down
contig34446	-2.83084	down
contig59773	-2.83084	down
contig84776	-2.83084	down
contig89098	-2.83084	down
contig93127	-2.83084	down
contig87771	-2.827	down
contig53683	-2.82692	down
contig37581	-2.82477	down
contig11880	-2.82262	down
contig37590	-2.82223	down
contig00853	-2.81877	down
contig37848	-2.81614	down
contig19955	-2.80899	down
contig48620	-2.80812	down
contig21941	-2.80485	down
contig51094	-2.80485	down
contig04016	-2.80353	down
contig09343	-2.80208	down
contig03781	-2.80047	down
contig07892	-2.80047	down
contig59445	-2.80047	down
contig14312	-2.79723	down
contig51769	-2.79484	down
contig03117	-2.79432	down
contig58108	-2.79432	down
contig50976	-2.79167	down
contig42509	-2.78926	down
contig86273	-2.7854	down
contig87073	-2.78504	down
contig93877	-2.78504	down
contig12100	-2.78504	down
contig68115	-2.78504	down
contig82976	-2.78504	down
contig35235	-2.7808	down
contig34207	-2.78021	down
contig54737	-2.77767	down
contig49432	-2.77621	down
contig84282	-2.77336	down
contig42031	-2.77274	down
contig13641	-2.76944	down
contig14628	-2.76854	down
contig08008	-2.76402	down
contig39510	-2.76373	down
contig66552	-2.76373	down
contig02714	-2.76186	down
contig54547	-2.76076	down
contig34788	-2.75976	down
contig25812	-2.75869	down
contig18574	-2.75684	down
contig18523	-2.75581	down
contig14094	-2.75385	down
contig40815	-2.75367	down
contig03619	-2.75141	down
contig81672	-2.75141	down
contig16516	-2.7497	down
contig58871	-2.74838	down
contig60932	-2.74838	down
contig88431	-2.74765	down
contig55924	-2.74572	down
contig81580	-2.74511	down
contig86439	-2.74459	down
contig57383	-2.74387	down
contig01025	-2.74033	down
contig87121	-2.7402	down
2-GH8N3EB02IJTFU	-2.73773	down
contig81179	-2.73773	down
contig38918	-2.73773	down
contig83177	-2.73773	down
contig43531	-2.73773	down
contig67429	-2.73773	down
contig88830	-2.73773	down
contig28671	-2.7351	down
contig21231	-2.73354	down
contig38919	-2.73291	down
0-FO0JX8101EDQ14	-2.72991	down
2-GH8N3EB02JNV7L	-2.72808	down
contig25382	-2.72792	down
contig42129	-2.72161	down
contig83549	-2.72161	down
1-GH8N3EB01B6Z3Y	-2.71837	down
contig05605	-2.71536	down
contig43590	-2.71371	down
contig81674	-2.70757	down
2-GH8N3EB02JZKBI	-2.70531	down
contig11050	-2.70531	down
contig38740	-2.70531	down
contig43813	-2.70531	down
contig81826	-2.70531	down
contig11098	-2.70435	down
0-FOWZWMP02LWYTG	-2.70121	down
contig51708	-2.70121	down
contig48615	-2.69334	down
contig14781	-2.69334	down
contig46601	-2.69213	down
contig81632	-2.69213	down
contig15540	-2.69186	down
contig38264	-2.68882	down
0-FO0JX8101C0M4M	-2.68882	down
contig44799	-2.68882	down
contig94637	-2.68882	down
0-FTYGYVA04I099C	-2.68882	down
contig11317	-2.68882	down
contig14235	-2.68882	down
contig16154	-2.68882	down
contig36131	-2.68882	down
0-FOWZWMP02NINO9	-2.67884	down
2-GH8N3EB02JNT0S	-2.67884	down
contig33339	-2.67884	down
contig42273	-2.67884	down
contig82021	-2.67519	down
contig61923	-2.67304	down
contig32462	-2.67214	down
contig10994	-2.67038	down
contig39933	-2.66841	down
contig58718	-2.66734	down
contig60698	-2.66172	down
contig01976	-2.66092	down
contig01296	-2.65769	down
contig50476	-2.65681	down
contig39751	-2.65149	down
contig02908	-2.64002	down
contig00418	-2.6382	down
contig19400	-2.6382	down
contig42502	-2.6382	down
contig23525	-2.6382	down
contig23948	-2.6382	down
2-GH8N3EB02JB3KY	-2.6382	down
contig34053	-2.6382	down
contig22751	-2.6382	down
contig26552	-2.6382	down
contig28922	-2.6382	down
contig30151	-2.6382	down
contig43596	-2.6382	down
contig57604	-2.6382	down
2-GH8N3EB02IRGDT	-2.6382	down
contig41795	-2.6382	down
contig79617	-2.6382	down
contig94062	-2.6382	down
0-FO0JX8101CMIT6	-2.6382	down
contig03898	-2.6382	down
contig27722	-2.6382	down
contig94271	-2.6382	down
contig17491	-2.63451	down
contig19734	-2.63339	down
0-FO0JX8101DA2X6	-2.6267	down
2-GH8N3EB02IL87V	-2.6267	down
1-GH8N3EB01ES9BE	-2.62602	down
contig38090	-2.62202	down
contig49144	-2.62042	down
contig50579	-2.61934	down
contig11250	-2.61422	down
contig20836	-2.61284	down
contig87558	-2.6122	down
2-GH8N3EB02GQCR3	-2.60981	down
contig32440	-2.60956	down
1-GH8N3EB01DM8H3	-2.60845	down
contig64835	-2.60845	down
contig58216	-2.60695	down
contig14816	-2.60613	down
contig14537	-2.60384	down
contig06378	-2.60343	down
contig87109	-2.60343	down
contig80696	-2.60343	down
contig15915	-2.59638	down
contig22129	-2.59638	down
contig26341	-2.59638	down
contig45302	-2.58717	down
contig04700	-2.58717	down
contig22028	-2.58697	down
contig12234	-2.58573	down
contig80504	-2.58573	down
1-GH8N3EB01AE1L1	-2.58573	down
contig05124	-2.58573	down
contig09044	-2.58573	down
contig09288	-2.58573	down
contig46742	-2.58573	down
contig50351	-2.58573	down
contig82588	-2.58573	down
contig83122	-2.58573	down
contig40725	-2.58498	down
contig43425	-2.58191	down
contig30967	-2.58086	down
contig03980	-2.58066	down
contig84772	-2.5795	down
contig91136	-2.57915	down
0-FUZKD2G01BAIGJ	-2.57807	down
contig00030	-2.57658	down
contig33150	-2.57627	down
contig82676	-2.57598	down
contig41443	-2.57279	down
contig21262	-2.56781	down
contig07039	-2.56781	down
contig25685	-2.56781	down
contig80479	-2.56781	down
contig36535	-2.56605	down
contig17344	-2.56264	down
contig21047	-2.56215	down
contig38471	-2.56058	down
contig55793	-2.56043	down
contig53885	-2.55939	down
2-GH8N3EB02I3YJV	-2.55876	down
2-GH8N3EB02IAELH	-2.55876	down
contig23283	-2.55876	down
contig45420	-2.55876	down
contig09292	-2.55573	down
contig06981	-2.55331	down
contig65703	-2.55331	down
contig59152	-2.55029	down
contig93750	-2.54966	down
contig17725	-2.54705	down
contig05529	-2.54705	down
contig50013	-2.54705	down
contig52171	-2.54705	down
contig47906	-2.54467	down
contig38817	-2.54454	down
2-GH8N3EB02IAC20	-2.54356	down
contig54956	-2.54356	down
contig45202	-2.54323	down
contig93985	-2.53779	down
contig00057	-2.53711	down
contig40726	-2.53617	down
3-GH8N3EB02FR5SN	-2.53128	down
contig56775	-2.53128	down
contig24060	-2.53128	down
contig40061	-2.53128	down
contig80995	-2.53128	down
3-GH8N3EB01EBISZ	-2.53128	down
contig34445	-2.53128	down
contig86517	-2.53128	down
contig12701	-2.52843	down
contig20583	-2.52543	down
contig51097	-2.52474	down
contig11101	-2.52433	down
contig00092	-2.52386	down
contig46196	-2.52333	down
0-FTYGYVA04ITATT	-2.52014	down
2-GH8N3EB02FHVZ6	-2.52014	down
contig62007	-2.5189	down
contig02411	-2.5179	down
contig90166	-2.5158	down
contig46198	-2.51534	down
contig21892	-2.51411	down
contig17433	-2.51365	down
contig22196	-2.51267	down
contig17812	-2.51096	down
contig01779	-2.50891	down
contig59240	-2.50891	down
contig82862	-2.50891	down
3-GH8N3EB01AO4ZW	-2.50891	down
contig07924	-2.50891	down
contig10560	-2.50891	down
contig55887	-2.50891	down
contig86848	-2.50891	down
contig32528	-2.50695	down
contig03534	-2.50641	down
contig33105	-2.506	down
contig81493	-2.50424	down
contig57771	-2.50389	down
0-FTYGYVA04J1BQZ	-2.50327	down
2-GH8N3EB02FQC28	-2.50178	down
contig57466	-2.50069	down
contig04583	-2.4971	down
contig38098	-2.49416	down
contig13564	-2.49381	down
1-GH8N3EB01BPHA7	-2.49381	down
0-FOWZWMP02OCU9F	-2.49381	down
contig22169	-2.49381	down
contig86315	-2.49381	down
contig87562	-2.49381	down
contig20138	-2.49357	down
1-GH8N3EB01BG5Z2	-2.49077	down
contig56767	-2.4898	down
contig19816	-2.48619	down
contig20517	-2.48408	down
contig62243	-2.48189	down
contig25697	-2.4811	down
contig10107	-2.47891	down
contig42041	-2.47561	down
contig84175	-2.4747	down
contig86845	-2.4747	down
contig23033	-2.4747	down
contig77906	-2.4747	down
contig84130	-2.4713	down
contig45056	-2.46643	down
contig18584	-2.46556	down
contig03070	-2.46471	down
contig38341	-2.46311	down
0-FUZKD2G01BS6T4	-2.46311	down
contig69059	-2.46311	down
contig10751	-2.46311	down
contig35512	-2.46311	down
contig59691	-2.46311	down
contig59901	-2.46311	down
contig60537	-2.46311	down
contig43912	-2.46153	down
contig36814	-2.45961	down
contig84138	-2.45887	down
contig01608	-2.45762	down
contig12062	-2.45533	down
contig15400	-2.45533	down
1-GH8N3EB01EIN3F	-2.45533	down
contig05985	-2.45533	down
contig22130	-2.45533	down
contig59813	-2.45533	down
contig93707	-2.45533	down
contig21501	-2.45338	down
contig11590	-2.45099	down
contig34587	-2.44975	down
contig14050	-2.44823	down
contig16231	-2.44751	down
contig29987	-2.44555	down
3-GH8N3EB02JZ4NB	-2.44555	down
4-GJVU7SP04JE0XY	-2.44555	down
contig45815	-2.44555	down
contig88997	-2.44388	down
contig88450	-2.44382	down
contig06902	-2.44228	down
contig36769	-2.44228	down
contig43628	-2.44071	down
contig47358	-2.43965	down
contig24221	-2.43951	down
2-GH8N3EB02GOGJ1	-2.4375	down
contig38609	-2.4375	down
contig21213	-2.4357	down
contig90698	-2.43491	down
contig02758	-2.43175	down
contig70694	-2.42407	down
contig39219	-2.42378	down
contig59484	-2.4158	down
contig82402	-2.4158	down
contig23943	-2.4158	down
contig58080	-2.4158	down
contig42968	-2.4158	down
contig92345	-2.4158	down
contig34957	-2.4158	down
contig52305	-2.4158	down
contig56338	-2.4158	down
contig24223	-2.4158	down
1-GH8N3EB01B75VS	-2.4158	down
contig59785	-2.4158	down
contig65378	-2.4158	down
contig40232	-2.41351	down
3-GH8N3EB02F7A83	-2.39853	down
contig24551	-2.39738	down
contig05690	-2.39719	down
contig49683	-2.39719	down
contig04322	-2.39613	down
contig14107	-2.39443	down
contig42139	-2.39378	down
contig82038	-2.3925	down
contig22038	-2.39234	down
contig37390	-2.39156	down
0-FTYGYVA04I4L06	-2.39156	down
4-GJVU7SP04IDD0C	-2.39156	down
contig47269	-2.39156	down
contig15339	-2.38884	down
contig38574	-2.38884	down
contig60565	-2.38884	down
contig57739	-2.38675	down
contig76008	-2.38543	down
contig24905	-2.38543	down
contig58909	-2.38543	down
2-GH8N3EB02H56Q4	-2.38444	down
contig36686	-2.38409	down
contig12954	-2.38264	down
contig01103	-2.38104	down
contig77997	-2.37833	down
contig26649	-2.37681	down
contig07178	-2.3764	down
contig00455	-2.37516	down
contig84477	-2.37516	down
contig74667	-2.37141	down
contig83976	-2.36963	down
contig56888	-2.36926	down
contig38610	-2.36707	down
0-FTYGYVA04JC274	-2.36689	down
2-GH8N3EB02GLYUZ	-2.36689	down
contig24521	-2.36689	down
contig24697	-2.36689	down
contig31588	-2.36689	down
contig56371	-2.36689	down
contig93401	-2.36603	down
contig14879	-2.36562	down
contig92944	-2.36363	down
contig00494	-2.36256	down
contig45538	-2.36136	down
contig47915	-2.36136	down
contig42416	-2.36041	down
contig93969	-2.35922	down
contig89092	-2.35809	down
contig19153	-2.35809	down
contig17188	-2.3573	down
contig14465	-2.3544	down
contig81705	-2.3544	down
0-FO0JX8101BUI6Q	-2.35167	down
contig51964	-2.34869	down
contig25386	-2.34824	down
0-FS6QTAF04IJVCV	-2.34742	down
contig50738	-2.34541	down
contig11274	-2.34329	down
contig32112	-2.34329	down
0-FO0JX8101BY9QT	-2.3418	down
contig39644	-2.3418	down
contig17048	-2.33985	down
contig61323	-2.33939	down
contig23476	-2.33719	down
contig52120	-2.33563	down
contig88129	-2.33497	down
contig09655	-2.33334	down
contig10162	-2.33334	down
contig24402	-2.33334	down
contig38065	-2.33334	down
contig47090	-2.33334	down
0-FOWZWMP02L9B4C	-2.33334	down
2-GH8N3EB02HWROK	-2.33334	down
contig24637	-2.33334	down
contig34459	-2.33334	down
contig25394	-2.33287	down
contig16662	-2.33246	down
contig37841	-2.33204	down
contig43045	-2.33141	down
contig03700	-2.32965	down
contig44163	-2.32786	down
contig15454	-2.32727	down
contig07616	-2.3261	down
contig20716	-2.32561	down
contig16797	-2.32466	down
contig26830	-2.32414	down
contig14127	-2.32269	down
contig41528	-2.32269	down
contig49523	-2.32269	down
0-FUZKD2G01AM961	-2.32117	down
contig05767	-2.32023	down
contig23296	-2.31627	down
contig52125	-2.31627	down
contig25670	-2.31627	down
contig87494	-2.31627	down
contig18295	-2.31392	down
contig88275	-2.31147	down
contig46126	-2.31083	down
0-FOWZWMP02L2UYU	-2.30889	down
contig38816	-2.30889	down
contig64873	-2.30889	down
contig89100	-2.30889	down
contig01858	-2.30477	down
contig80682	-2.30477	down
contig05248	-2.30409	down
contig92346	-2.30309	down
contig83448	-2.30215	down
contig90032	-2.30215	down
1-GH8N3EB01DW119	-2.30033	down
contig84480	-2.30033	down
contig34284	-2.30033	down
contig92701	-2.29961	down
contig03942	-2.29551	down
0-FO0JX8101EE0VB	-2.29027	down
contig10210	-2.29027	down
contig62073	-2.29027	down
contig81160	-2.29027	down
contig32894	-2.29027	down
contig43244	-2.29027	down
contig39159	-2.28867	down
contig60267	-2.28652	down
contig93774	-2.2847	down
contig83070	-2.2815	down
contig16390	-2.27905	down
contig16253	-2.2783	down
contig05496	-2.27792	down
contig20010	-2.27476	down
contig48711	-2.27445	down
contig24919	-2.27378	down
contig03600	-2.27235	down
contig38194	-2.27141	down
contig79961	-2.27141	down
contig34396	-2.26913	down
contig45043	-2.26623	down
contig16070	-2.2638	down
1-GH8N3EB01BO1XM	-2.2638	down
2-GH8N3EB02FSSAY	-2.2638	down
1-GH8N3EB01DJ3WX	-2.26148	down
contig39485	-2.26068	down
contig30667	-2.25968	down
contig91345	-2.25534	down
contig20987	-2.25427	down
contig20810	-2.25405	down
contig39484	-2.2523	down
contig59260	-2.2523	down
2-GH8N3EB02GURGV	-2.25117	down
contig86178	-2.24955	down
contig15458	-2.24898	down
contig01113	-2.24588	down
contig03393	-2.24588	down
contig34197	-2.24588	down
contig57974	-2.24588	down
contig25544	-2.24588	down
4-GJVU7SP04IQ7ZT	-2.24588	down
4-GJVU7SP04JDCIV	-2.24588	down
contig46449	-2.24588	down
contig60476	-2.24588	down
contig87251	-2.24588	down
1-GH8N3EB01BJKU2	-2.24432	down
contig22350	-2.24308	down
contig44059	-2.24113	down
contig19803	-2.23802	down
contig17374	-2.23766	down
4-GJVU7SP04JGLV0	-2.23766	down
contig62036	-2.23683	down
contig38895	-2.23683	down
contig36373	-2.23683	down
contig01127	-2.23523	down
contig37145	-2.23381	down
contig35188	-2.23294	down
3-GH8N3EB01BYVDG	-2.23294	down
contig00420	-2.23294	down
contig29946	-2.23294	down
contig42744	-2.23294	down
contig71801	-2.23294	down
contig17295	-2.23188	down
contig37727	-2.23138	down
contig12250	-2.22939	down
contig44306	-2.22939	down
contig20420	-2.2286	down
contig11312	-2.22773	down
contig89010	-2.22695	down
contig37180	-2.22677	down
contig08671	-2.22614	down
contig12959	-2.22614	down
1-GH8N3EB01BDPSF	-2.22316	down
contig34953	-2.22316	down
contig49023	-2.22316	down
2-GH8N3EB02FZNZK	-2.22316	down
contig33940	-2.22316	down
contig69252	-2.22316	down
contig79225	-2.22316	down
contig47645	-2.2221	down
contig85950	-2.22067	down
contig19732	-2.22041	down
contig05484	-2.22041	down
contig03861	-2.21986	down
contig15121	-2.21786	down
3-GH8N3EB02F9RZ0	-2.21786	down
contig11785	-2.2155	down
contig25284	-2.2155	down
contig41764	-2.2155	down
contig56681	-2.2155	down
contig89368	-2.21489	down
4-GJVU7SP04I1KBN	-2.21417	down
contig27668	-2.20935	down
contig54933	-2.20756	down
contig12998	-2.20671	down
contig01912	-2.20548	down
contig45888	-2.20486	down
contig70761	-2.2043	down
contig53052	-2.2043	down
contig59730	-2.2043	down
contig33230	-2.2032	down
contig46642	-2.20281	down
contig21872	-2.2014	down
contig61153	-2.20007	down
contig23918	-2.19944	down
contig03235	-2.19938	down
contig23760	-2.19716	down
contig16318	-2.19675	down
contig43597	-2.19649	down
contig14575	-2.19608	down
contig11185	-2.19584	down
contig38627	-2.19387	down
1-GH8N3EB01EZPDS	-2.19341	down
contig34882	-2.19341	down
contig54662	-2.19191	down
contig29023	-2.19141	down
contig05594	-2.18839	down
contig36605	-2.18839	down
contig69451	-2.18839	down
contig19915	-2.18769	down
contig15885	-2.18698	down
contig20857	-2.18689	down
contig62158	-2.1858	down
contig37302	-2.18448	down
contig50841	-2.18283	down
contig44605	-2.18134	down
contig91769	-2.17999	down
contig40608	-2.17876	down
contig87888	-2.1768	down
contig86286	-2.17662	down
contig45896	-2.17662	down
contig21685	-2.1748	down
contig37064	-2.17433	down
contig02342	-2.17368	down
contig62395	-2.17188	down
contig52719	-2.16964	down
contig06164	-2.16916	down
contig91284	-2.16828	down
contig23722	-2.16788	down
contig00354	-2.16613	down
contig54878	-2.16304	down
contig62321	-2.16149	down
contig57504	-2.16015	down
contig52955	-2.15847	down
contig11216	-2.1582	down
contig25171	-2.15791	down
contig40805	-2.15759	down
contig90604	-2.15701	down
contig03757	-2.15277	down
contig07919	-2.15277	down
contig22079	-2.15277	down
contig00191	-2.15277	down
contig45784	-2.15277	down
contig00790	-2.15277	down
contig22090	-2.15277	down
2-GH8N3EB02F76Z2	-2.15277	down
contig06715	-2.15277	down
contig01839	-2.15277	down
contig05549	-2.15277	down
contig42156	-2.15277	down
contig53950	-2.15277	down
contig55108	-2.15277	down
contig59848	-2.15277	down
contig87687	-2.15277	down
contig38246	-2.15277	down
contig08060	-2.15277	down
contig24748	-2.15277	down
contig92521	-2.15277	down
1-GH8N3EB01C7OQD	-2.15277	down
1-GH8N3EB01EW48I	-2.15277	down
contig40529	-2.15277	down
contig90442	-2.15277	down
contig13904	-2.15154	down
contig88566	-2.14985	down
contig19255	-2.1462	down
contig52682	-2.14588	down
contig04732	-2.1445	down
contig45528	-2.14417	down
contig12258	-2.14295	down
contig67214	-2.1407	down
contig93482	-2.1407	down
contig23738	-2.13862	down
contig55935	-2.13827	down
contig61642	-2.1375	down
contig02552	-2.13665	down
contig05197	-2.13462	down
2-GH8N3EB02HICQ7	-2.13439	down
contig17791	-2.13436	down
contig12620	-2.13287	down
contig33741	-2.13124	down
contig23763	-2.13096	down
contig19041	-2.1304	down
contig31310	-2.1295	down
contig86893	-2.12902	down
contig30305	-2.12886	down
contig41928	-2.12852	down
contig51797	-2.12852	down
contig03795	-2.12782	down
contig37959	-2.1263	down
contig41733	-2.1263	down
contig36570	-2.12401	down
contig76948	-2.12362	down
contig20934	-2.12272	down
contig37938	-2.12248	down
contig57264	-2.12035	down
contig11962	-2.12035	down
contig22057	-2.11896	down
contig42003	-2.11624	down
2-GH8N3EB02H3EEX	-2.11624	down
contig21328	-2.11624	down
0-FO0JX8101C0PZT	-2.11505	down
contig47980	-2.11378	down
contig58031	-2.11378	down
contig49124	-2.11364	down
contig38079	-2.11241	down
contig23079	-2.11241	down
contig12149	-2.11095	down
contig24611	-2.11095	down
contig38665	-2.11095	down
contig42534	-2.11095	down
contig61273	-2.11095	down
contig12377	-2.10883	down
contig52380	-2.10838	down
contig01147	-2.10768	down
contig21576	-2.10697	down
contig16603	-2.10648	down
contig41735	-2.10529	down
contig61949	-2.10487	down
contig23810	-2.10386	down
contig49123	-2.1023	down
contig03201	-2.10093	down
contig40388	-2.10027	down
contig11920	-2.09933	down
contig16223	-2.09832	down
contig54272	-2.09763	down
contig07967	-2.09663	down
contig18038	-2.09554	down
contig90510	-2.09454	down
contig18272	-2.09388	down
contig47085	-2.09388	down
contig27924	-2.09276	down
contig17804	-2.09137	down
contig04423	-2.09071	down
contig55515	-2.08718	down
contig31117	-2.08718	down
contig24154	-2.08565	down
0-FOWZWMP02LJ8KF	-2.0846	down
contig26612	-2.0846	down
contig35879	-2.0846	down
contig45661	-2.08234	down
contig45802	-2.07877	down
contig74383	-2.07877	down
contig14104	-2.07877	down
contig17714	-2.07877	down
contig51903	-2.07877	down
contig57122	-2.07877	down
contig93515	-2.07877	down
contig21708	-2.07393	down
contig07770	-2.0737	down
contig46350	-2.0737	down
contig01077	-2.07288	down
contig20452	-2.0714	down
contig37787	-2.07079	down
contig17021	-2.069	down
contig42328	-2.06788	down
contig62396	-2.06788	down
contig21457	-2.06776	down
contig20852	-2.06752	down
contig80177	-2.06547	down
contig28431	-2.06464	down
contig06539	-2.0635	down
contig38590	-2.0635	down
contig37845	-2.06286	down
contig15988	-2.06145	down
contig03746	-2.05791	down
contig90316	-2.05699	down
0-FO0JX8101C1L9U	-2.05655	down
3-GH8N3EB02IC6VG	-2.05655	down
contig23821	-2.05655	down
contig93645	-2.05626	down
contig20023	-2.05503	down
contig45606	-2.05323	down
contig58858	-2.05323	down
contig81045	-2.05323	down
contig79081	-2.05323	down
contig54744	-2.05323	down
contig87470	-2.05323	down
contig39696	-2.04787	down
contig05296	-2.04628	down
contig15754	-2.04585	down
contig41466	-2.04585	down
4-GJVU7SP04IYJRJ	-2.04585	down
contig24090	-2.04497	down
2-GH8N3EB02F6IPB	-2.04383	down
contig51293	-2.04029	down
contig59081	-2.04029	down
contig28618	-2.04029	down
contig45708	-2.04029	down
contig42504	-2.0398	down
contig19075	-2.03769	down
1-GH8N3EB01E75MO	-2.03729	down
contig61857	-2.03652	down
contig61864	-2.03596	down
contig45772	-2.03247	down
contig01010	-2.03247	down
contig37667	-2.03138	down
contig37682	-2.0307	down
contig31953	-2.02945	down
contig41943	-2.02878	down
contig02398	-2.02788	down
contig78888	-2.02724	down
2-GH8N3EB02G90C5	-2.02647	down
contig13037	-2.02627	down
contig46552	-2.02586	down
contig34528	-2.02485	down
contig49698	-2.02485	down
contig88164	-2.02461	down
contig03357	-2.0239	down
contig40635	-2.02365	down
contig01430	-2.02349	down
contig61719	-2.02349	down
contig38272	-2.02189	down
contig22696	-2.02164	down
2-GH8N3EB02F5OXQ	-2.02067	down
contig19016	-2.01847	down
contig33615	-2.01847	down
contig47707	-2.01847	down
contig89786	-2.01664	down
contig25716	-2.01595	down
contig07142	-2.01527	down
contig59958	-2.01527	down
contig38185	-2.01456	down
contig38088	-2.01399	down
contig91745	-2.01304	down
contig81224	-2.01304	down
contig45164	-2.01097	down
contig21302	-2.01075	down
contig40782	-2.00669	down
contig26222	-2.00593	down
contig46412	-2.00077	down
contig24065	-2.00077	down
contig42879	-2.00077	down
contig86336	-2.00077	down
0-FO0JX8101C2H1S	-2.00077	down
contig24719	-2.00077	down
contig90045	-2.00077	down
contig25201	-2.00077	down
0-FO0JX8101D7F5A	-2.00077	down
contig04060	-2.00077	down
contig40414	-2.00077	down
contig60716	-2.00077	down
contig62415	-2.00077	down
contig74792	-2.00077	down
contig88794	-2.00077	down
contig91538	-2.00077	down
contig23245	-1.99703	down
contig41650	-1.9965	down
contig45369	-1.99643	down
contig62373	-1.99482	down
contig92878	-1.99434	down
contig39521	-1.99385	down
contig10668	-1.99378	down
contig24290	-1.99335	down
contig42626	-1.99252	down
contig37844	-1.9923	down
contig11559	-1.99131	down
contig90840	-1.99131	down
contig14175	-1.99004	down
contig80635	-1.99004	down
contig08423	-1.99004	down
contig05171	-1.9891	down
4-GJVU7SP04I0NQH	-1.98838	down
1-GH8N3EB01CL606	-1.98676	down
contig93436	-1.98641	down
contig42578	-1.98612	down
contig24835	-1.98612	down
contig43109	-1.98612	down
contig07289	-1.98465	down
contig38934	-1.98322	down
contig79324	-1.98284	down
contig55128	-1.98168	down
contig60634	-1.9814	down
4-GJVU7SP04H85OT	-1.9797	down
contig20140	-1.97859	down
contig03010	-1.97833	down
contig17721	-1.97636	down
contig04149	-1.97589	down
contig41449	-1.97468	down
contig00842	-1.9738	down
contig22104	-1.97262	down
contig11404	-1.9722	down
contig40115	-1.97123	down
contig90220	-1.97077	down
contig02837	-1.9694	down
contig18015	-1.9692	down
contig41981	-1.96896	down
contig29716	-1.96834	down
contig36590	-1.96834	down
contig36729	-1.96834	down
contig38583	-1.96816	down
contig14969	-1.9673	down
contig17149	-1.96606	down
contig21557	-1.9647	down
contig46571	-1.96329	down
contig82107	-1.96329	down
1-GH8N3EB01EN6H8	-1.96329	down
contig20441	-1.96329	down
2-GH8N3EB02FOERG	-1.96209	down
contig27463	-1.96099	down
contig86497	-1.96066	down
contig38416	-1.95943	down
contig15788	-1.95932	down
contig32697	-1.9589	down
contig31184	-1.95833	down
contig42208	-1.95685	down
4-GJVU7SP04I423I	-1.95637	down
contig18822	-1.95637	down
contig51675	-1.95637	down
contig58467	-1.95637	down
contig57897	-1.95496	down
2-GH8N3EB02GPBDB	-1.95422	down
contig18357	-1.95422	down
contig09851	-1.95422	down
contig05527	-1.95313	down
contig58669	-1.95313	down
contig57172	-1.95283	down
contig25539	-1.95215	down
contig24222	-1.94949	down
contig89356	-1.94738	down
contig05358	-1.94632	down
contig45983	-1.94632	down
contig40610	-1.94632	down
contig87129	-1.94632	down
contig59750	-1.94632	down
contig06707	-1.94632	down
contig37451	-1.94632	down
2-GH8N3EB02F90Q2	-1.94632	down
contig00633	-1.94632	down
contig19140	-1.94486	down
contig92321	-1.94071	down
contig05612	-1.94066	down
2-GH8N3EB02IRT6P	-1.94047	down
contig17331	-1.93776	down
contig13025	-1.93776	down
contig22591	-1.93723	down
contig39084	-1.93704	down
contig22059	-1.93615	down
2-GH8N3EB02F8F05	-1.93518	down
contig86900	-1.93518	down
contig46292	-1.93518	down
contig15687	-1.93427	down
contig18694	-1.93393	down
contig55730	-1.93346	down
contig89944	-1.9332	down
contig10647	-1.93238	down
contig52511	-1.93193	down
contig91629	-1.93038	down
4-GJVU7SP04I369L	-1.93038	down
contig17304	-1.92845	down
contig86539	-1.9266	down
contig43260	-1.92638	down
contig41844	-1.92623	down
3-GH8N3EB02I6Y3D	-1.9262	down
contig27538	-1.926	down
contig02680	-1.926	down
contig26742	-1.926	down
contig61118	-1.926	down
contig61675	-1.926	down
contig41728	-1.92548	down
contig40234	-1.92482	down
contig18039	-1.92395	down
contig35960	-1.92395	down
contig13283	-1.91879	down
contig92611	-1.9183	down
contig42384	-1.9183	down
3-GH8N3EB01EPPX6	-1.9183	down
contig13208	-1.9183	down
contig16817	-1.9183	down
contig06982	-1.9183	down
contig39164	-1.91581	down
contig03139	-1.91383	down
contig48092	-1.9133	down
contig52141	-1.91313	down
contig07914	-1.91288	down
contig40417	-1.91237	down
contig07467	-1.91176	down
contig21765	-1.91101	down
contig19472	-1.91087	down
contig42362	-1.91036	down
3-GH8N3EB02GO9US	-1.90884	down
contig14769	-1.90884	down
contig31874	-1.90884	down
contig90673	-1.90884	down
contig26769	-1.90679	down
0-FO0JX8101BF86T	-1.90613	down
contig18109	-1.90613	down
contig22231	-1.90594	down
contig14567	-1.90539	down
contig55278	-1.90484	down
contig13408	-1.9043	down
2-GH8N3EB02FTFYY	-1.90409	down
contig89287	-1.90382	down
contig18587	-1.9036	down
contig10709	-1.90186	down
contig92764	-1.90123	down
contig14691	-1.90123	down
contig19303	-1.90123	down
contig04838	-1.90123	down
contig44031	-1.90123	down
contig44419	-1.90123	down
contig57074	-1.90123	down
contig46914	-1.9	down
contig26032	-1.89932	down
contig12870	-1.8983	down
contig13725	-1.89693	down
contig07641	-1.89497	down
contig21919	-1.89342	down
contig41929	-1.89326	down
contig49095	-1.89313	down
contig20829	-1.89195	down
contig10818	-1.89172	down
contig15651	-1.89114	down
contig38902	-1.89071	down
contig39341	-1.88973	down
contig58941	-1.88973	down
contig73680	-1.88973	down
contig57851	-1.88973	down
contig66609	-1.88973	down
contig42056	-1.88934	down
contig06557	-1.88906	down
contig44618	-1.88844	down
contig20520	-1.88834	down
2-GH8N3EB02GZUP8	-1.88787	down
contig31941	-1.88669	down
contig38841	-1.88553	down
contig39798	-1.88529	down
contig49187	-1.88375	down
contig37739	-1.88293	down
contig52544	-1.88293	down
contig69096	-1.88147	down
contig87850	-1.88147	down
contig38960	-1.88123	down
contig49926	-1.8792	down
contig59713	-1.8792	down
contig09239	-1.87815	down
contig19873	-1.87815	down
contig34334	-1.87815	down
contig52863	-1.87815	down
contig53046	-1.87524	down
contig02941	-1.8746	down
contig32021	-1.87388	down
4-GJVU7SP04IOSAN	-1.87266	down
contig02857	-1.87266	down
contig20231	-1.87063	down
contig57180	-1.87037	down
contig45052	-1.87037	down
contig40659	-1.86952	down
0-FOWZWMP02LEXKP	-1.86898	down
contig33987	-1.86898	down
contig15446	-1.86793	down
contig15574	-1.86691	down
contig17405	-1.86646	down
contig38331	-1.86646	down
contig05179	-1.86646	down
contig44352	-1.86646	down
contig46256	-1.86646	down
contig82600	-1.86646	down
contig22413	-1.86519	down
contig34402	-1.86479	down
contig42961	-1.86479	down
contig55840	-1.86326	down
contig48021	-1.86232	down
0-FTYGYVA04H1V0L	-1.86187	down
contig77940	-1.86059	down
contig23600	-1.85832	down
contig23707	-1.85832	down
contig40335	-1.85832	down
contig42521	-1.85832	down
contig23878	-1.85668	down
contig41637	-1.85638	down
contig39594	-1.85602	down
contig49454	-1.85469	down
contig14157	-1.85378	down
contig90589	-1.85321	down
contig00558	-1.85254	down
contig46055	-1.8519	down
contig14532	-1.84791	down
contig58897	-1.84791	down
contig06051	-1.84644	down
contig16811	-1.84501	down
contig55761	-1.84302	down
contig52943	-1.84281	down
contig91511	-1.84207	down
contig18011	-1.84207	down
contig25757	-1.8419	down
contig27919	-1.84141	down
contig01780	-1.84056	down
contig82639	-1.8403	down
contig35700	-1.8392	down
contig22460	-1.83914	down
contig21082	-1.83837	down
contig44847	-1.83702	down
contig05559	-1.83518	down
contig59845	-1.83084	down
contig40565	-1.83084	down
contig52516	-1.83084	down
contig38456	-1.83084	down
contig38023	-1.83084	down
contig43106	-1.83084	down
contig25373	-1.83084	down
contig14888	-1.83084	down
contig34766	-1.83084	down
contig42283	-1.83084	down
2-GH8N3EB02GRPZD	-1.83084	down
contig28120	-1.83084	down
contig31293	-1.83084	down
contig44811	-1.83084	down
contig80732	-1.83084	down
contig18052	-1.83084	down
contig57269	-1.83084	down
contig59847	-1.83084	down
contig74650	-1.83084	down
contig28157	-1.83084	down
contig41898	-1.83084	down
contig48443	-1.83084	down
contig50509	-1.83084	down
contig83101	-1.83084	down
contig90728	-1.82725	down
contig13607	-1.82683	down
contig59557	-1.82439	down
contig02546	-1.82406	down
contig41621	-1.82389	down
contig20951	-1.82361	down
contig39353	-1.82325	down
contig87275	-1.82306	down
contig41531	-1.8228	down
contig07621	-1.82268	down
contig19333	-1.82162	down
contig45376	-1.82156	down
contig03141	-1.82079	down
contig18544	-1.8205	down
contig00717	-1.82035	down
contig37967	-1.82019	down
contig59630	-1.81941	down
contig22924	-1.81877	down
contig13701	-1.81863	down
contig87882	-1.81742	down
contig51082	-1.8169	down
contig61800	-1.81634	down
contig07705	-1.81397	down
contig43767	-1.81383	down
contig00451	-1.81356	down
contig55615	-1.81356	down
contig57016	-1.81066	down
contig88493	-1.80972	down
contig24632	-1.80947	down
contig38905	-1.80947	down
contig04119	-1.80812	down
contig43670	-1.80485	down
contig19214	-1.80318	down
contig59559	-1.80283	down
contig87521	-1.80283	down
contig40358	-1.80271	down
contig58203	-1.80208	down
contig54403	-1.80047	down
contig41182	-1.80033	down
contig32049	-1.79767	down
contig72414	-1.79767	down
contig38598	-1.79561	down
contig18377	-1.79551	down
contig17178	-1.79528	down
contig77647	-1.79522	down
contig21969	-1.79218	down
contig42648	-1.79032	down
contig38212	-1.7902	down
contig87505	-1.7902	down
contig41979	-1.78926	down
contig43332	-1.78885	down
contig59599	-1.78861	down
contig19629	-1.78777	down
contig37746	-1.78777	down
contig15736	-1.78777	down
contig32265	-1.78777	down
contig05865	-1.7869	down
contig93634	-1.78645	down
contig07319	-1.78542	down
contig38996	-1.78504	down
contig43351	-1.78504	down
contig86370	-1.78459	down
contig41999	-1.7845	down
contig38278	-1.7837	down
contig41581	-1.78365	down
contig03669	-1.78314	down
3-GH8N3EB02FYTGM	-1.78193	down
contig22053	-1.78193	down
contig18923	-1.78047	down
contig62247	-1.77996	down
contig00121	-1.77986	down
contig55787	-1.77837	down
contig05232	-1.77837	down
contig86847	-1.77837	down
contig40783	-1.77767	down
contig07367	-1.77717	down
contig54389	-1.77653	down
contig93155	-1.7763	down
contig23318	-1.7761	down
contig37947	-1.77598	down
1-GH8N3EB01EO9BI	-1.77513	down
4-GJVU7SP04IF6LO	-1.77426	down
contig10861	-1.77426	down
contig61292	-1.77426	down
contig22721	-1.77362	down
contig43501	-1.77274	down
contig15178	-1.77101	down
contig40667	-1.76944	down
contig59276	-1.76944	down
contig21589	-1.76944	down
contig13450	-1.76944	down
contig58576	-1.76671	down
contig27322	-1.76671	down
contig62076	-1.76639	down
contig87415	-1.76575	down
contig10802	-1.76373	down
contig39998	-1.76312	down
contig30394	-1.76273	down
contig87347	-1.76198	down
contig13158	-1.76045	down
contig30928	-1.76045	down
contig92901	-1.75895	down
contig52834	-1.75778	down
contig61358	-1.75684	down
contig16867	-1.75684	down
0-FTYGYVA04I38TO	-1.75684	down
contig16703	-1.75655	down
contig40818	-1.75529	down
contig19036	-1.75516	down
contig41882	-1.75465	down
contig23880	-1.75397	down
contig41746	-1.75367	down
contig14777	-1.75223	down
contig06504	-1.75141	down
contig46247	-1.75141	down
contig57077	-1.75141	down
contig24661	-1.75099	down
contig57956	-1.75022	down
contig16331	-1.74992	down
contig90991	-1.74877	down
0-FOWZWMP02NJKTG	-1.74838	down
contig87003	-1.7469	down
contig31400	-1.74645	down
contig56638	-1.74645	down
contig84392	-1.74645	down
2-GH8N3EB02I5QY9	-1.74511	down
contig35364	-1.74511	down
contig59735	-1.74511	down
contig93626	-1.74511	down
contig02253	-1.74468	down
contig90046	-1.74338	down
contig00140	-1.74338	down
contig62417	-1.74278	down
contig18473	-1.7423	down
contig57748	-1.74191	down
contig42079	-1.74096	down
contig91867	-1.73936	down
contig19860	-1.73921	down
contig38362	-1.73912	down
contig10695	-1.73773	down
contig22542	-1.73773	down
3-GH8N3EB02FSOC5	-1.73773	down
contig16636	-1.73773	down
contig17263	-1.7363	down
contig20901	-1.73614	down
contig17040	-1.73463	down
2-GH8N3EB02J6KME	-1.73463	down
contig16594	-1.73266	down
contig86669	-1.73266	down
contig52590	-1.73068	down
contig18111	-1.73031	down
contig38005	-1.72991	down
contig09970	-1.72896	down
contig91747	-1.72896	down
contig38432	-1.72781	down
contig18674	-1.72746	down
contig17483	-1.72732	down
contig34063	-1.72701	down
contig42613	-1.72701	down
contig87008	-1.72701	down
contig40629	-1.72393	down
contig93586	-1.72393	down
contig45200	-1.72393	down
contig48548	-1.72393	down
contig26120	-1.72393	down
contig42950	-1.72357	down
contig02449	-1.72308	down
contig32558	-1.72278	down
contig16317	-1.72161	down
contig43819	-1.72122	down
contig02760	-1.72096	down
contig21755	-1.72066	down
contig23988	-1.72066	down
contig41440	-1.71746	down
contig26661	-1.71667	down
0-FO0JX8101AHY5F	-1.71536	down
contig15086	-1.71536	down
contig26879	-1.71348	down
contig41480	-1.71348	down
2-GH8N3EB02HZAME	-1.71348	down
1-GH8N3EB01EP4XT	-1.7122	down
contig04546	-1.7122	down
contig51403	-1.7122	down
contig15197	-1.71169	down
contig18458	-1.71169	down
contig16993	-1.71132	down
contig18791	-1.71046	down
0-FTYGYVA04JZQB0	-1.70953	down
contig40570	-1.70836	down
contig23701	-1.70703	down
contig54333	-1.70634	down
contig50086	-1.70531	down
contig24555	-1.70531	down
contig37626	-1.70531	down
contig04090	-1.70531	down
contig28725	-1.70531	down
contig12211	-1.70531	down
contig15853	-1.70531	down
contig19912	-1.70531	down
contig64602	-1.70531	down
contig83673	-1.70531	down
contig47916	-1.70439	down
contig19561	-1.70264	down
contig48269	-1.70233	down
contig31886	-1.70211	down
1-GH8N3EB01CXDMC	-1.70078	down
contig43499	-1.70053	down
contig19961	-1.6996	down
3-GH8N3EB01DTHSI	-1.69934	down
contig03048	-1.6992	down
contig21086	-1.69874	down
contig59401	-1.69874	down
contig53703	-1.69839	down
contig16015	-1.69757	down
0-FO0JX8101D3J0W	-1.69757	down
contig10490	-1.69757	down
contig31679	-1.69757	down
contig45642	-1.69634	down
contig06978	-1.69591	down
2-GH8N3EB02FMEX3	-1.69591	down
contig06615	-1.69591	down
contig24077	-1.69591	down
contig43522	-1.69591	down
contig48056	-1.69591	down
0-FTYGYVA04ICJFL	-1.69519	down
contig05340	-1.69434	down
contig45250	-1.69373	down
contig02306	-1.69334	down
contig31428	-1.69334	down
contig87941	-1.69334	down
contig38828	-1.69144	down
contig23871	-1.69066	down
contig25590	-1.69066	down
contig38823	-1.6898	down
contig32090	-1.68882	down
contig88451	-1.68882	down
contig23618	-1.68882	down
contig47024	-1.68803	down
contig16049	-1.68748	down
contig02314	-1.68676	down
contig93621	-1.68645	down
contig90931	-1.68597	down
contig12506	-1.68589	down
contig58902	-1.68499	down
contig58061	-1.68343	down
contig35994	-1.68328	down
contig45537	-1.68328	down
contig44866	-1.68291	down
contig09963	-1.6822	down
contig87628	-1.68146	down
contig13330	-1.67884	down
3-GH8N3EB02FQIQL	-1.67884	down
contig26638	-1.67884	down
contig42544	-1.67872	down
contig83453	-1.6778	down
contig41086	-1.6774	down
contig03162	-1.67633	down
contig00214	-1.6756	down
contig01037	-1.67412	down
contig15127	-1.67412	down
contig38656	-1.67412	down
contig47687	-1.6708	down
contig41904	-1.6699	down
contig89654	-1.66878	down
contig02275	-1.66857	down
[truncated: 4,110 more rows]
